# Supplementary material for: Identification of Growth Phases and Influencing Factors in Cultivations with AGE1.HN Cells Using Set-Based Methods
Source: PubMed Central journal article supplement (PMC3732265; doi:10.1371/journal.pone.0068124), 2013-08-02
Supplement: pone.0068124.s003.pdf [file pone.0068124.s003.pdf]

## Text S2

**Table S1.** Experimental data of bioreactor cultivation.

| time<br><i>h</i> | Amn<br>mM | Glc<br>mM | Gln<br>mM | Lac<br>mM | $X_d$<br>$10^6 \frac{\text{cells}}{\text{ml}}$ | $X_v$<br>$10^6 \frac{\text{cells}}{\text{ml}}$ | pH   |
|------------------|-----------|-----------|-----------|-----------|------------------------------------------------|------------------------------------------------|------|
| 0.0              | 0         | 30.0      | 5.03      | 0         | 0.03                                           | 0.56                                           | 7.24 |
| 19.3             | 0.64      | 28.2      | 4.28      | 3.72      | 0.06                                           | 0.78                                           | 7.14 |
| 43.5             | 1.57      | 25.1      | 3.24      | 9.86      | 0.13                                           | 1.14                                           | 7.09 |
| 66.8             | 2.62      | 21.0      | 1.94      | 14.8      | 0.15                                           | 1.71                                           | 7.10 |
| 90.5             | 3.73      | 16.1      | 0.84      | 21.4      | 0.18                                           | 2.59                                           | 7.19 |
| 113.5            | 4.24      | 9.23      | 0.5       | 34.0      | 0.31                                           | 3.57                                           | 7.10 |
| 137.3            | 4.87      | 0         | 0.49      | 49.4      | 0.41                                           | 4.08                                           | 7.17 |
| 161.8            | 6.36      | 0         | 0.46      | 45.7      | 0.91                                           | 4.06                                           | 7.17 |
| 188.3            | 7.68      | 0         | 0.45      | 40.9      | 1.38                                           | 3.11                                           | 7.21 |

**Table S2.** Experimental data of shaker flask cultivation.

| time<br><i>h</i> | Amn<br>mM | Glc<br>mM | Gln<br>mM | Lac<br>mM | $X_d$<br>$10^6 \frac{\text{cells}}{\text{ml}}$ | $X_v$<br>$10^6 \frac{\text{cells}}{\text{ml}}$ | pH   |
|------------------|-----------|-----------|-----------|-----------|------------------------------------------------|------------------------------------------------|------|
| 0.0              | 0.43      | 30.94     | 4.68      | 0.88      | 0.02                                           | 0.56                                           | 7.27 |
| 10.3             | 0.67      | 30.44     | 4.04      | 1.72      | 0.02                                           | 0.58                                           | 7.15 |
| 23.0             | 1.03      | 30.34     | 3.94      | 4.63      | 0.02                                           | 0.75                                           | 7.10 |
| 34.0             | 1.29      | 28.94     | 3.72      | 7.18      | 0.04                                           | 0.91                                           | 7.03 |
| 47.0             | 1.65      | 27.75     | 3.34      | 10.83     | 0.02                                           | 1.10                                           | 6.98 |
| 54.8             | 1.87      | 27.25     | 3.21      | 12.71     | 0.03                                           | 1.26                                           | 6.97 |
| 69.2             | 2.35      | 26.00     | 2.55      | 14.99     | 0.06                                           | 1.72                                           | 6.98 |
| 81.5             | 2.87      | 25.01     | 2.09      | 16.71     | 0.05                                           | 1.75                                           | 6.93 |
| 94.0             | 3.37      | 24.06     | 1.75      | 18.22     | 0.08                                           | 1.84                                           | 6.85 |
| 104.8            | 3.76      | 22.46     | 1.46      | 19.23     | 0.07                                           | 2.36                                           | 6.86 |
| 118.2            | 4.34      | 21.42     | 1.07      | 21.43     | 0.11                                           | 2.55                                           | 6.80 |
| 129.5            | 4.85      | 20.42     | 0.82      | 23.15     | 0.11                                           | 2.64                                           | 6.77 |
| 142.2            | 5.28      | 19.52     | 0.64      | 25.59     | 0.17                                           | 3.08                                           | 6.65 |
| 152.0            | 5.49      | 17.93     | 0.58      | 26.42     | 0.23                                           | 3.14                                           | 6.57 |
| 165.8            | 6.02      | 17.93     | 0.57      | 29.82     | 0.52                                           | 3.11                                           | 6.48 |
| 176.7            | 6.15      | 16.38     | 0.55      | 29.82     | 0.90                                           | 2.82                                           | 6.32 |
| 190.5            | 6.25      | 15.83     | 0.52      | 29.97     | 2.41                                           | 1.14                                           | 6.20 |
